# Supplementary material for: Biogenic flower-shaped Au–Pd nanoparticles: synthesis, SERS detection and catalysis towards benzyl alcohol oxidation
Source: Royal Society of Chemistry journal article supplement (doi:10.1039/c3ta13922k), 2013-11-07
Supplement: c3ta13922k.pdf [file c3ta13922k.pdf]

## Supporting Information

# Biogenic flower-shaped Au-Pd nanoparticles: synthesis, SERS detection and catalysis towards benzyl alcohol oxidation

Daohua Sun,\* Genlei Zhang, Jiale Huang, Xinde Jiang, Xiaolian Jing, Yanmei Zheng,

Jing He, and Qingbiao Li

Department of Chemical and Biochemical Engineering, College of Chemistry and

Chemical Engineering, Fujian Provincial Key Laboratory of Chemical Biology,

Xiamen University, Xiamen, 361005, China

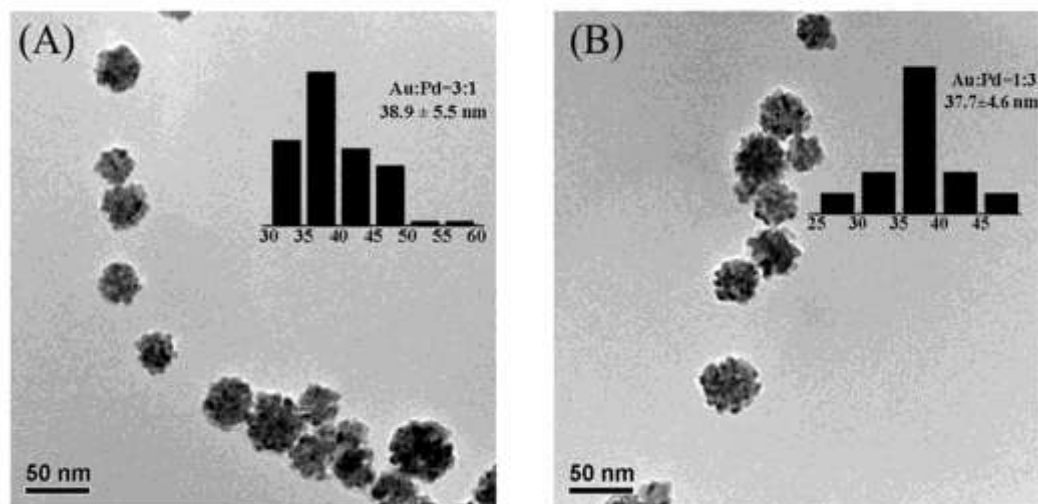

**Figure 1S.** TEM images and histograms (inlet) of as-synthesized Au-Pd bimetallic NPs with initial Au/Pd ratios of (A) 3:1 and (B) 1:3.

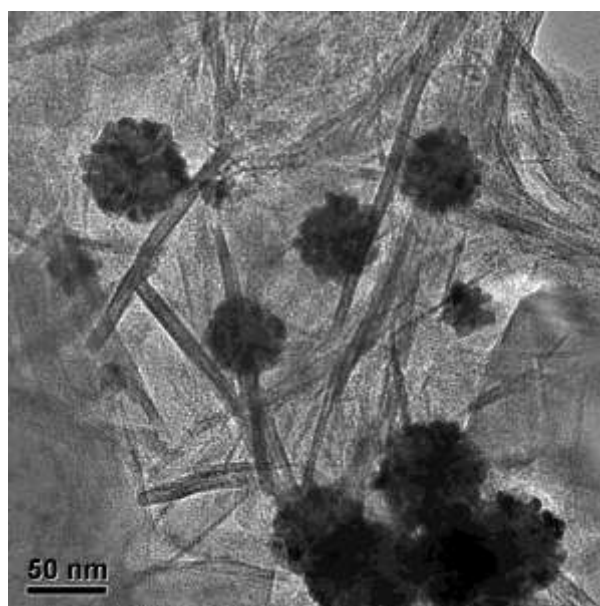

**Figure 2S.** TEM image of flower-shaped Au(1)Pd(1)/MgO/SI catalysts.

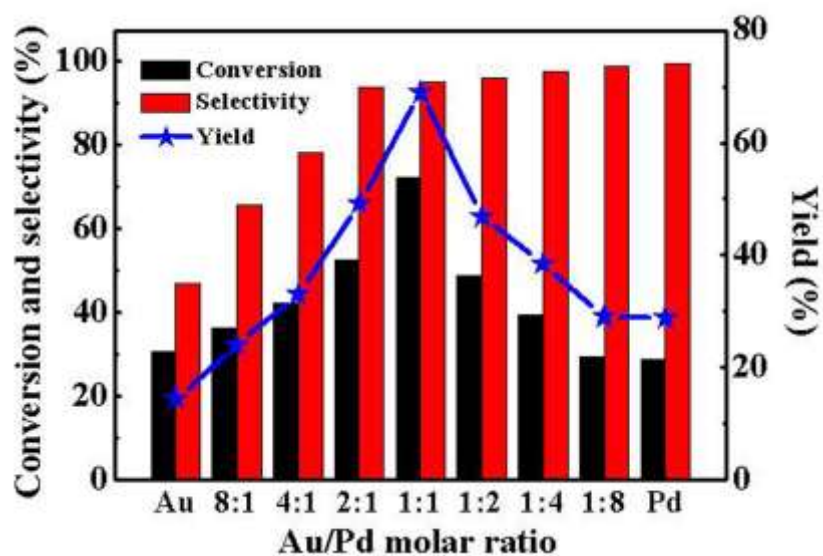

**Figure 3S.** Catalytic performance of flower-shaped Au-Pd/MgO catalysts with different Au/Pd molar ratios prepared by SI method. Reaction condition: metal load, 2 wt%; 0.4 g catalyst; O<sub>2</sub> flow rate, 90 mL·min<sup>-1</sup> (1 atm); reaction temperature, 90 °C; reaction time, 6 h; and stirring rate, 1200 rpm.
